# Supplementary material for: A Universal Protocol for Faba Bean (Vicia faba L.) Tissue Culture and Transformation
Source: Research Square preprint supplement (doi:10.21203/rs.3.rs-5866259/v1), 2025-02-24
Supplement: Supplementary file 2 [file a00b8539790103b3fd2d8e4a.docx]

*Supplementary Table 1. Different hormone concentrations in culture media (MS).*

| Treatment | Hormone and concentration (mg/L) | | | |
| --- | --- | --- | --- | --- |
| 2,4-D | NAA | BAP | KIN |
| MS+01 | 4 | - | - | - |
| MS+02 | 4 | 0.5 | - | - |
| MS+03 | - | 0.5 | 1 | - |
| MS+04 | 4 | - | 1 | - |
| MS+05 | - | 0.5 | - | - |
| MS+06 | 4 | - | 2 | - |
| MS+07 | - | 0.5 | 1 | - |
| MS+08 | 2 | - | - | - |
| MS+09 | 3 | - | - | - |
| MS+10 | - | - | - | - |
| MS+11 | - | 0.5 | 1.5 | - |
| MS+12 | - | 0.5 | 1.5 | - |
| MS+13 | - | 1.0 | 2.0 | 0.5 |

*Supplementary Table 2. PCR amplification protocol.*

| Step | Description | Temperature and time | PCR component | Volume (µl) |
| --- | --- | --- | --- | --- |
| 1 | Initial denaturation | 95 °C for 2 min | 10X Extra Buffer  (ID: 5100510-1500) | 2.0 |
| 2 | Denaturation | 95 °C for 30 sec | dNTPs (10 mM) | 0.5 |
| 3 | Annealing | 55 °C for 30 sec | Forward primer (10 µM) | 0.5 |
| 4 | Extension | 72 °C for 30 sec | Reverse primer (10 µM) | 0.5 |
| 5 | Step 2-4 repeated for 30 cycles | - | Taq DNA Polymerase (5 U/ul)  (ID: 5101600-0100) | 0.3 |
| 6 | Final extension | 72 °C for 5 min | DNA (100 ng/µl) | 1.0 |
|  |  |  | Total volume | 20 µl |

*Supplementary Table 3. Composition of MS1 medium.*

| Component | Amount (g/L) |
| --- | --- |
| MS media with B5 vitamins (*Duchefa Biochemie – M0245.00050*) | 4.4 |
| Sucrose (*Carl Roth – 4621.3*) | 30 |
| Phyto Agar (*Duchefa Biochemie – P1003.1000*) | 7 |
|  |  |
| pH | 5.8 |
| Hormones | Conc. (mg/L) |
| NAA (Naphthaleneacetic acid) | 0.5 |
| BAP (6-Benzylaminopurine) | 4.5 |
| KIN (Kinetin) | 0.5 |

*Supplementary Table 4. Composition of MS3 medium.*

| Component | Amount (g/L) |
| --- | --- |
| MS media with B5 vitamins (*Duchefa Biochemie – M0245.00050*) | 2.2 |
| Sucrose (*Carl Roth – 4621.3*) | 25 |
| Phyto Agar (*Duchefa Biochemie – P1003.1000*) | 7 |
|  |  |
| pH | 5.8 |
| Hormone | Conc. (mg/L) |
| IAA (Indole-3-acetic acid) | 1.5 |
